# Supplementary material for: Effects of volatile organic compound ether on cell responses and gene expressions in Arabidopsis
Source: PubMed Central journal article supplement (PMC5430555; doi:10.1186/s40529-015-0112-8), 2016-01-06
Supplement: 40529_2015_112_MOESM1_ESM.pdf [file 40529_2015_112_MOESM1_ESM.pdf]

**Supplementary information.** The primers used for real-time RT-PCR assay.

| Gene      | Accession number       | Forward primer sequence<br>5' -> 3'    | Reverse primer sequence<br>5' -> 3'    |
|-----------|------------------------|----------------------------------------|----------------------------------------|
| RBOHD     | NM_124165              | <sup>1441</sup> TCGAAACACCATCACTTGGCT  | <sup>1565</sup> CCGCATGGAGTAAAAACACCG  |
| CSD1      | NM_100757              | <sup>124</sup> TGTTACGGGGACTATCTTTT    | <sup>276</sup> TTGAAATGTGGACCAGTAGA    |
| APX1      | NM_001035914           | <sup>285</sup> ATGACGAAGAACTACCCAAC    | <sup>575</sup> ATGGAAATCAGCAAAAGAGA    |
| ACS 2     | NM_100030              | <sup>1050</sup> TCCGATGATCAGTTTGTGGA   | <sup>1293</sup> AGGAAGAGCCAGGAGACACA   |
| ACS 6     | NM_117199              | <sup>231</sup> ATGGGTCTCGCTGAAAATCA    | <sup>579</sup> TCACTCCGGTTCATCTC       |
| ACO1      | NM_127517              | <sup>29</sup> GCAACTATGCCTCCTAACAC     | <sup>217</sup> CTTCTCTCCATCCAACCTCTG   |
| ACO2      | NM_104918              | <sup>657</sup> AGCAATTATCCACCATGTCC    | <sup>856</sup> TTGGTTATCACCTCAAGTTG    |
| ACO3      | NM_101073              | <sup>224</sup> GAGAGGATGACAAAGGAACA    | <sup>371</sup> TAGATTGAGGGAGATGATGG    |
| ACO4      | NM_100380              | <sup>774</sup> TCGATGTTCCCTCCGGTTAAG   | <sup>977</sup> CTGCTTCTTTTCCGATCAGC    |
| ACO5      | NM_106161              | <sup>456</sup> AGCGAGCAAGATGATGGAAGT   | <sup>603</sup> AGGATGAGGACAAGGAGGGT    |
| ICS       | NM_106129<br>NM_101744 | <sup>682</sup> CCTCTGATTTCGTGCCTATGG   | <sup>1094</sup> GGATCAATGTCGGTATCCGT   |
| LOX4      | NM_105911              | <sup>1311</sup> CGAGGGCTTGCTTAGATACG   | <sup>1502</sup> GTGAGAGCGGAGTGAAGACC   |
| LOX5      | NM_113137              | <sup>1065</sup> CTCTGTTTGCGACAAGACCA   | <sup>1273</sup> CCGATCTGCTCTCTTTGAGG   |
| PR1       | NM_127025              | <sup>77</sup> GCTCTTGTAGGTGCTCTTGT     | <sup>240</sup> TTGCCCTTAGTTGTTCTGC     |
| PR2       | NM_115586              | <sup>538</sup> TCCTCCGTCTCAAGGAAGGT    | <sup>668</sup> CCGTGTCTCCCATGTAGCTG    |
| PR3       | NM_112085              | <sup>3</sup> TGCCTCCACAAAAAGAAAACCA    | <sup>149</sup> CATAGACCGTTGGGGCAGAG    |
| PR4       | NM_111344              | <sup>211</sup> CAATTGTTGGGGAAGTGGGC    | <sup>326</sup> AAGCACTCACGGCTCTCAAA    |
| PR5       | NM_106161              | <sup>325</sup> GGAGACTGTGGCGGTCTAAG    | <sup>472</sup> CGGATGGTCTTATCCCCAGC    |
| MPK1      | NM_100895              | <sup>863</sup> TCGGAAGCCAAAGAGAAGAA    | <sup>1069</sup> TGTATGGATGCTGGAGTGCT   |
| MPK3      | NM_114433              | <sup>810</sup> ATGTTTGGTCTGTTGGTTGT    | <sup>969</sup> TATCTTTTTCGCATCCTCATT   |
| MPK4      | NM_116367              | <sup>1215</sup> ACCGTGAAACAGTCAAGTTC   | <sup>1327</sup> AAAGCAGAGCAAAACAAAAC   |
| MPK6      | NM_129941              | <sup>766</sup> CAAACCTGCGACCTAAAATC    | <sup>927</sup> TACAGCCTACAGACCAAACA    |
| MKP1      | NM_115385              | <sup>2032</sup> TCCCTTCCCAAACCTTCTCCT  | <sup>2194</sup> AAAGCAGGTGTGCCTCTGTT   |
| AP2C1     | NM_128557              | <sup>132</sup> GACCTCTTCTCCTTCTCCTC    | <sup>415</sup> CATCACCTTCTCTCTCAACC    |
| PP2A1     | NM_104676              | <sup>492</sup> AAGGTGCGTTACAGGGACAGA   | <sup>595</sup> CCGTATTTCTCAAGCATTCTG   |
| PP2A2     | NM_100918              | <sup>254</sup> TATCGGAGGCGGATGTGAG     | <sup>362</sup> GAATATCGCCGCAAACGGTA    |
| PP2A3 & 4 | NM_001202803           | <sup>499</sup> CTGTTACGCTGTTAGTCGCC    | <sup>634</sup> TTGCGTTGCCGTACTTTCTG    |
| ACT2      | NM_112764              | <sup>638</sup> AACTCTCCCGCTATGTATGTCGC | <sup>938</sup> CCATCTCCTGCTCGTAGTCAACA |
